# Supplementary material for: Residency and movement patterns of an apex predatory shark (Galeocerdo cuvier) at the Galapagos Marine Reserve
Source: PubMed Central journal article supplement (PMC5567640; doi:10.1371/journal.pone.0183669), 2017-08-22
Supplement: pone.0183669.s002.pdf [file pone.0183669.s002.pdf]

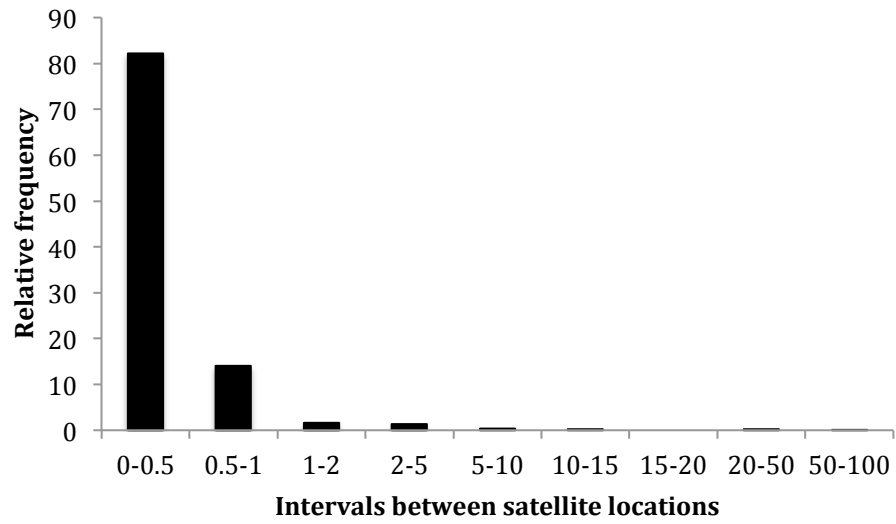

**S2 Fig. Frequency distribution of the time interval (in days) between subsequent detections of satellite locations obtained for tagged sharks.**
