# Supplementary material for: Residency and movement patterns of an apex predatory shark (Galeocerdo cuvier) at the Galapagos Marine Reserve
Source: PubMed Central journal article supplement (PMC5567640; doi:10.1371/journal.pone.0183669), 2017-08-22
Supplement: pone.0183669.s003.pdf [file pone.0183669.s003.pdf]

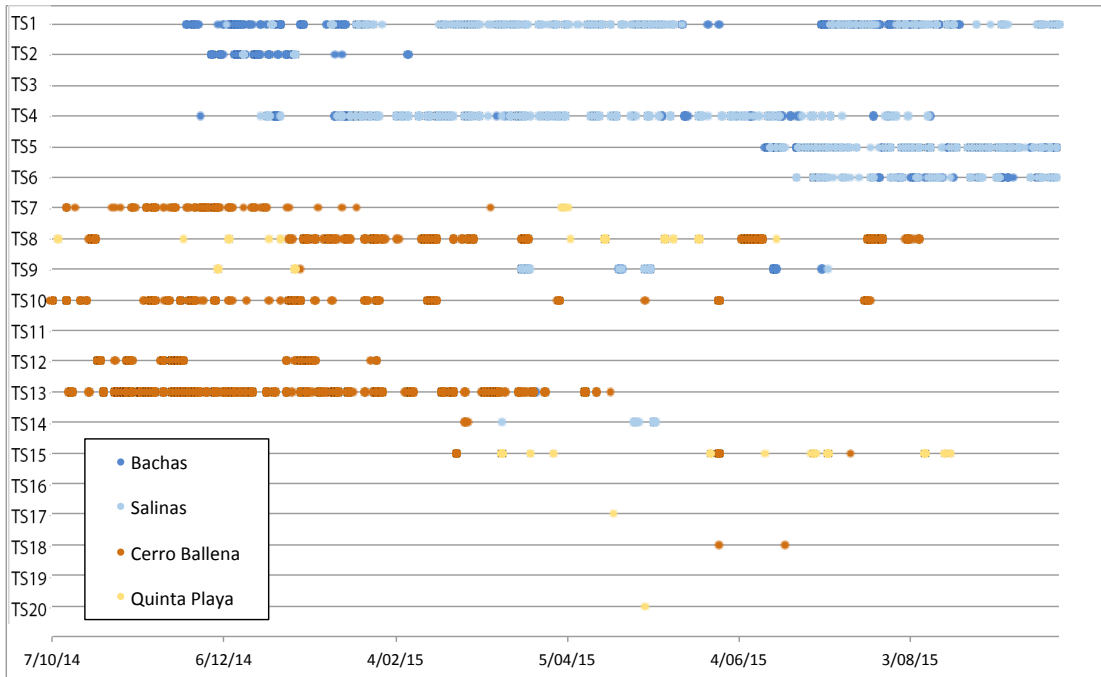

**S3 Fig. Chronology of acoustic detections for each of the acoustic-tagged sharks (TS1-TS20) by site (colour coded).**
